# Supplementary material for: Indoor Air Remediation Using Biochar from Bark: Impact of Particle Size and Pollutant Concentration
Source: Hindawi journal article supplement (doi:10.1155/2024/1537588), 2024-01-01
Supplement: f1 [file 1537588.f1.docx]

**SUPPLEMENTARY MATERIALS**

**Indoor air remediation using biochar from bark: Impact of particle size and pollutant concentration.**

Mariem Zouari 1,2,*, Silvo Hribernik3, Matthew Schwarzkopf 1,2

1 InnoRenew CoE, Livade 6a, 6310 Izola, Slovenia

2 Faculty of mathematics, natural sciences, and information technologies; University of Primorska, Muzejski trg 2, 6000 Koper, Slovenia

3 Faculty of Electrical Engineering and Computer Science, University of Maribor, Koroška cesta 46, SI-2000 Maribor, Slovenia


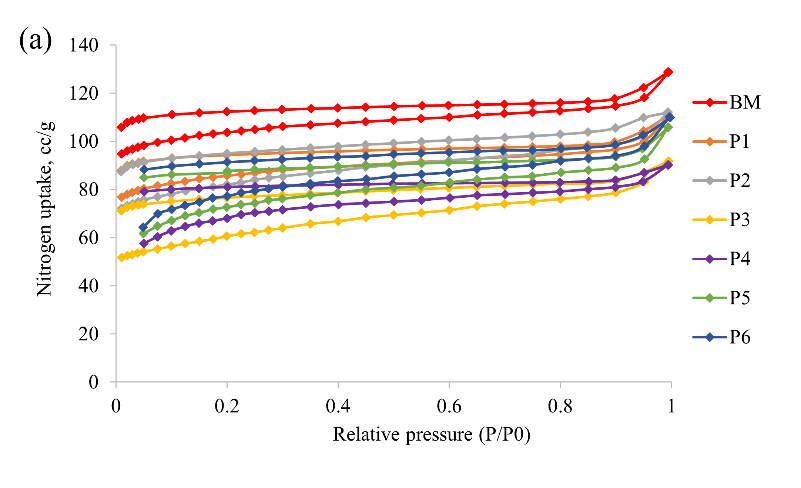

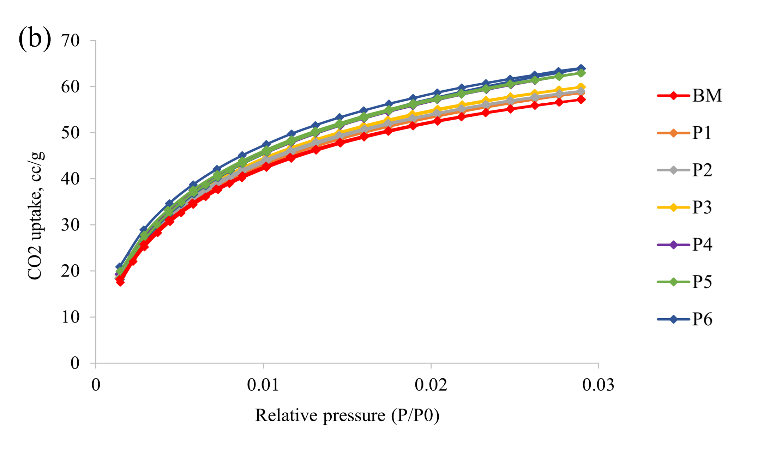


**Fig. S1.** Adsorption-desorption isotherms of biochar samples obtained from (a) N2 analysis and (b) CO2 analysis.


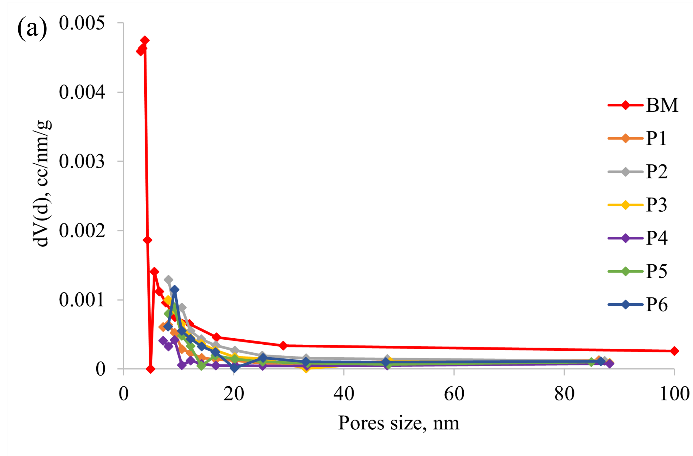

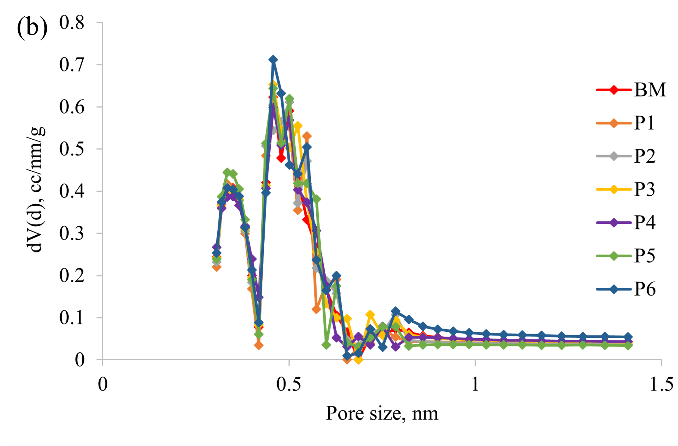


**Fig.S2.** Pores size distributions obtained from (a) N2 analysis according to the BJH model and (b) CO2 analysis according to the DFT model.


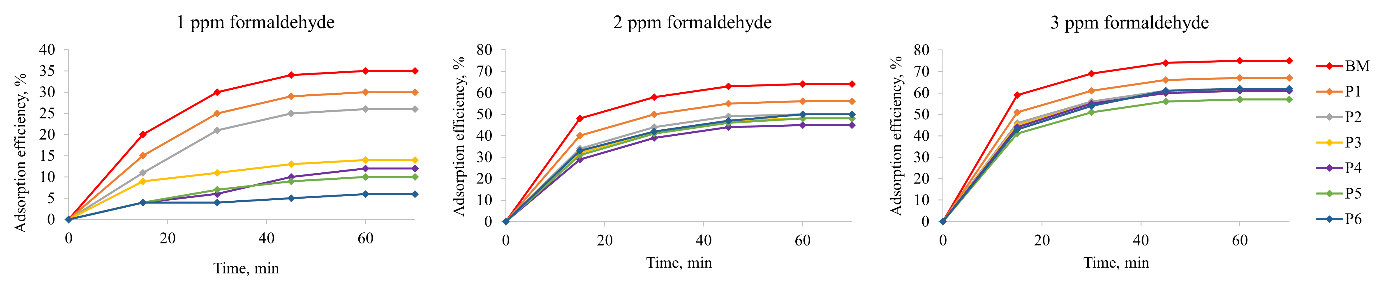

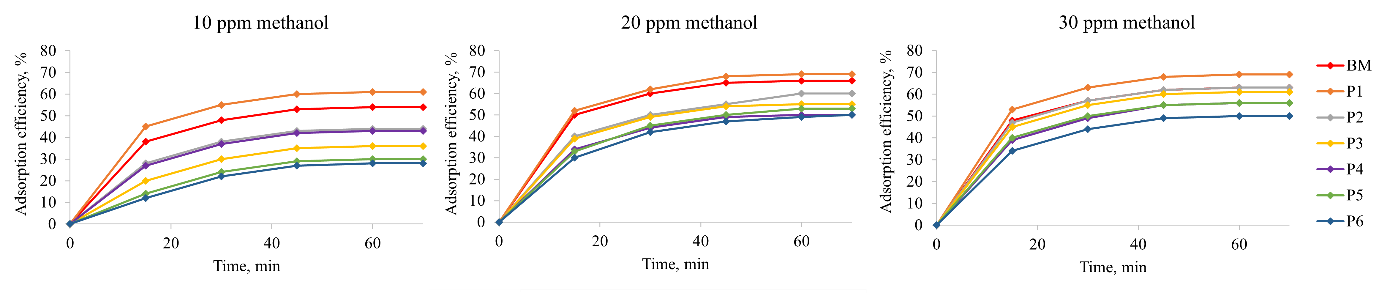


**Fig. S3.** Effect of the contact time on the adsorption efficiency of formaldehyde and methanol onto the biochar samples.
